# Supplementary material
Source: PubMed Central journal article supplement (PMC4979755)

# Supplemental Figure 1

A

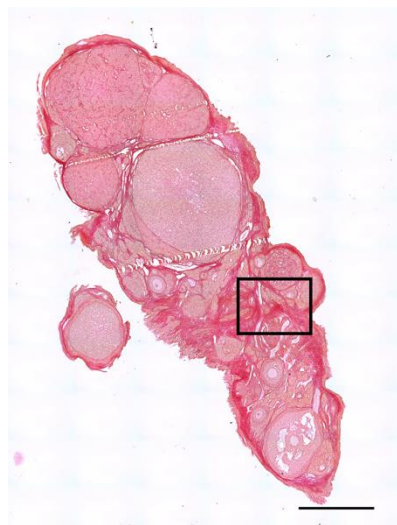

B

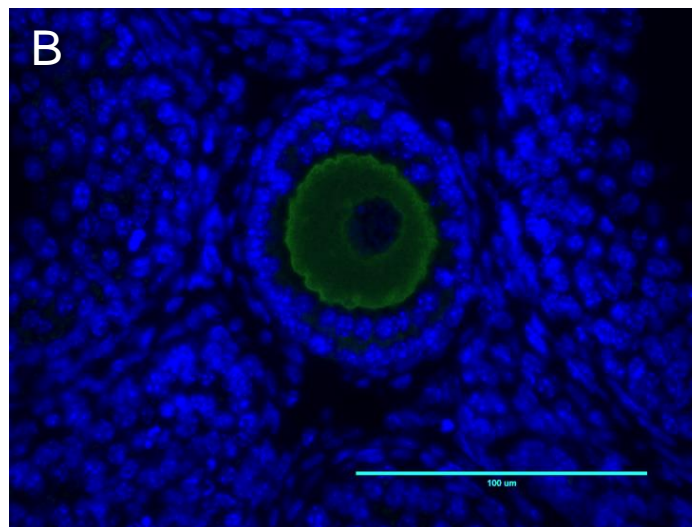

C

Brightfield

Texas Red

GFP

DAPI

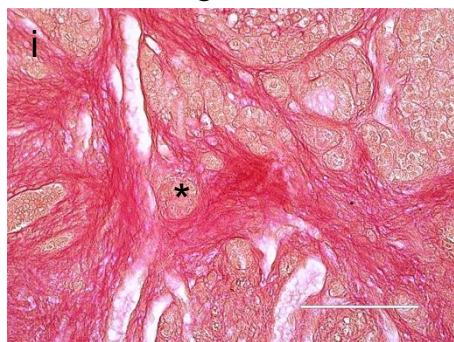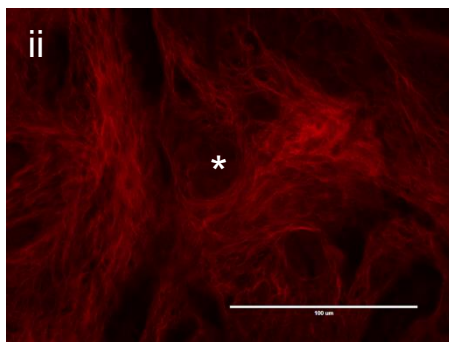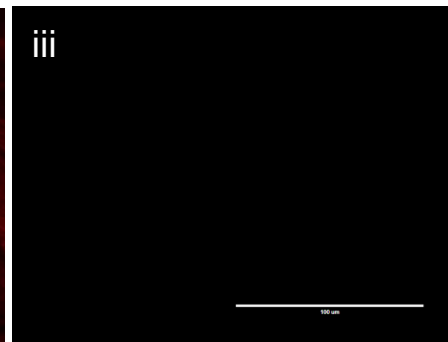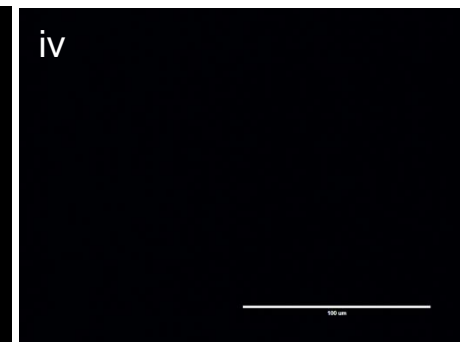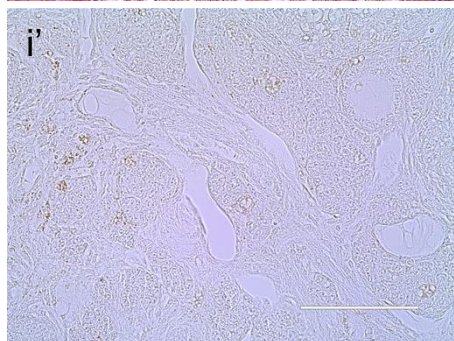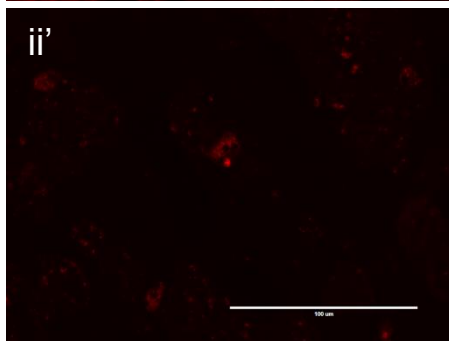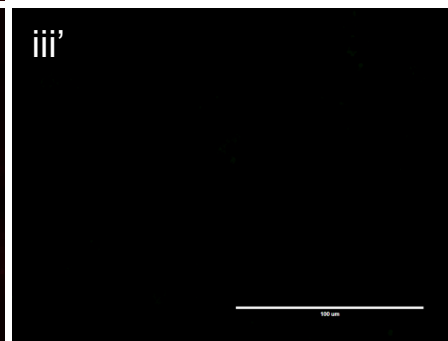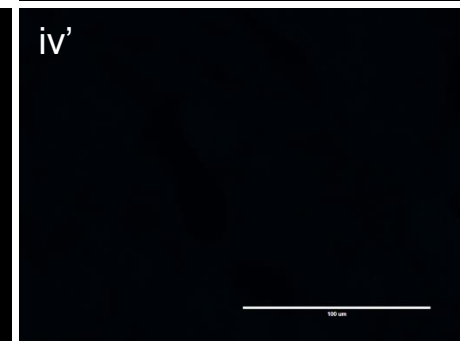

Supplement: NIHMS803683-supplement-01.pdf [file NIHMS803683-supplement-01.pdf]
